# East Asian-specific novel loci associated with late-onset Alzheimer's disease: the GARD cohort Genome-wide study

Sarang Kang<sup>a, b</sup>, Tamil Iniyan Gunasekaran<sup>a, c</sup>, Kyu Yeong Choi<sup>a</sup>, Jang Jae Lee<sup>a</sup>, Sungho Won<sup>d</sup>, Eun Hyun Seo<sup>a, e</sup>, Pan-Woo Ko<sup>f</sup>, Ji Yeon Chung<sup>a, g</sup>, Seong-Min Choi<sup>a, h</sup>, Young Min Lee<sup>i</sup>, Jee Hyang Jeong<sup>j</sup>, Kyung Won Park<sup>k</sup>, Min Kyung Song<sup>a, l</sup>, Ho-Won Lee<sup>f</sup>, Ki Woong Kim<sup>m</sup>, Seong Hye Choi<sup>n</sup>, Dong Young Lee<sup>o</sup>, Sang Yun Kim<sup>p</sup>, Hoowon Kim<sup>a, g</sup>, Byeong C. Kim<sup>a, h</sup>, Takeshi Ikeuchi<sup>q</sup>, Jungsoo Gim<sup>a, r, \*</sup>, Kun Ho Lee<sup>a, b, r, s, \*</sup>

<sup>a</sup> *Gwangju Alzheimer's & Related Dementias Cohort Research Center, Chosun University, Gwangju, Korea*

<sup>b</sup> *Department of Integrative Biological Sciences, Chosun University, Gwangju, Korea*

<sup>c</sup> *Department of Biomedical Sciences, Chosun University, Gwangju, Korea*

<sup>d</sup> *Department of Public Health Science, Graduate School of Public Health, Seoul National University, Seoul, Korea*

<sup>e</sup> *Department of Premedical Science, Chosun University College of Medicine, Gwangju, Korea*

<sup>f</sup> *Department of Neurology, Kyungpook National University School of Medicine, Daegu, Korea*

<sup>g</sup> *Department of Neurology, Chosun University Hospital, Gwangju, Korea*

<sup>h</sup> *Department of Neurology, Chonnam National University Medical School, Gwangju, Korea*

<sup>i</sup> *Department of Psychiatry, Pusan National University School of Medicine, Busan, Korea*

<sup>j</sup> *Department of Neurology, Ewha Womans University Mokdong Hospital, Ewha Womans University School of Medicine, Seoul, Korea*

<sup>k</sup> *Department of Neurology, Donga University College of Medicine, Busan, Korea*

<sup>l</sup> *Chonnam national university Gwangju 2nd geriatric hospital, Gwangju, Korea*

<sup>m</sup> *Department of Neuropsychiatry, Seoul National University Bundang Hospital, Seongnam, Korea*

<sup>n</sup> *Department of Neurology, Inha University School of Medicine, Incheon, Korea*

<sup>o</sup> *Department of Neuropsychiatry, Seoul National University Hospital, Seoul, Korea*

<sup>p</sup> *Department of Neurology, Seoul National University Bundang Hospital, Seongnam, Korea*

<sup>q</sup> *Department of Molecular Genetics, Brain Research Institute, Niigata University, Niigata, Japan*

<sup>r</sup> *Department of Biomedical Science, Chosun University, Gwangju, Korea*

<sup>s</sup> *Korea Brain Research Institute, Daegu, Korea*

**Correspondence:** [\*] Correspondence to: Jungsoo Gim, Department of Biomedical Science, Chosun University, Gwangju, South Korea; Email: [jgim@chosun.ac.kr](mailto:jgim@chosun.ac.kr), Kun Ho Lee, Department of Biomedical Science, Chosun University, Gwangju, South Korea, Email: [leekho@chosun.ac.kr](mailto:leekho@chosun.ac.kr)

**Keywords:** Genome-wide association study (GWAS), Alzheimer's disease, East Asian, novel loci, APOE, SNP,

**Running title:** East Asian-specific novel loci associated with LOAD

## ABSTRACT

The high genetic heritability of Alzheimer's disease has contributed to the multi-directional and large-scale genomic studies to discover genetic factors, and so far many massive studies have been reported. However, the majority of genetic factors have been identified through European races, and relatively few studies using East Asians to discover genetic factors. In this study, East Asian specific loci is first reported through GWAS using GARD cohorts, which have been intensively recruited and managed by a single institution. ApoE-stratified GWAS with the AD cases and matched controls (n=2,291) in the Korean cohort and validation analysis using a Japanese sample (n=1,956) replicated six previously reported loci (genes) including ApoE and suggested two novel susceptible loci in *LRIG1* and *CACNA1A* gene. This study demonstrates that discovery of AD-associated variants can be accomplished in ethnic groups of a more homogeneous genetic background using samples comprising fewer subjects.

## INTRODUCTION

A genetic component has consistently been identified as an important antecedent factor in Alzheimer disease (AD), whereby Apolipoprotein E (ApoE) explains the largest portion of the disease [1; 2]. The effect of ApoE genotype, however, is highly varies among populations [3]. One noteworthy example is that the  $\epsilon 4$  allele is virtually absent among Arabs living in northern Israeli community where the prevalence of dementia is roughly double than in European ancestry [4].

After identifying the only locus (ApoE) with a sample size of 1086 individuals in 2007 , an updated GWAS from the International Genomics of Alzheimer's Project (IGAP) discovered 24 susceptibility loci for late onset Alzheimer's disease (LOAD) with an increased sample size of 94 437 individuals [5]. These loci, enriched in various biological pathways including immune responses and endocytosis suggesting genetic heterogeneity or complex nature of the LOAD, have been identified with mostly individuals of European ancestry.

Genetic studies in diverse population have increased our understanding of genetic architecture of LOAD [6; 7; 8; 9; 10]. Studies of non-European ancestry populations might have a chance to discover variants that are rare or absent and thus showing a smaller effect size in European ancestry. Notably, discovery of such AD risk susceptible loci, displaying allelic heterogeneity among diverse populations, has been accomplished in non-European ancestry groups of a more homogeneous genetic background using samples comprising several thousand or much fewer subjects [8; 9].

In this present work, we leverage genetic architecture of Koreans, a homogeneous population maintaining a distinct genetic profile with high prevalence of AD among persons ages 65 years and older, to discover AD-associated genes and variants. For that purpose, we first perform GWAS in Koreans using the Korea Biobank Array (referred to as Korean Chip) designed for Koreans [11] and imputation with the multiethnic panel [12], and validate the findings by combining GWAS results obtained from the Japanese population.

## MATERIALS AND METHODS

### ***Study Sample***

Study participants were sampled from the GARD (Gwangju Alzheimer's & Related Dementias) cohort, a longitudinal single-center study designed to develop clinical, imaging, genetic, and other biomarkers for the early detection and tracking of dementia (mostly AD) from local senior citizens aged 60 or older in Gwangju city, South Korea. Out of 13,845 participants, 2,291 (1,119 AD dementia and 1,172 cognitive normal) participants were chosen to maximize contrast between cases and controls for the GWAS. All cases were at least 60 years old and met NINCDS-ADRDA for AD[13], while cognitively healthy controls were at least 70 years old and either judged to be cognitively normal or did not meet pathological criteria (**Supplementary Methods**).

### ***Genotyping and Imputation***

We analyzed 2,291 Koreans (1,119 AD cases and 1,172 controls) for discovery and 1,956 Japanese (980 AD cases and 976 controls) for replication, respectively genotyped with Korean Chip [11] and Japonica array [9]. We applied extensive quality control measures used in the standard protocol [14] and excluded subjects with a low genotyping success rate (95%), heterozygosity outliers and cryptic relatedness. We assessed study population heterogeneity by means of a principal component analysis (PCA) and multidimensional scaling (MDS) (**Supplementary Fig. 1**), and removed before proceeding with further analyses. We also excluded SNPs with a minor allele frequency <1%, a genotyping success rate <95% or a deviation of the genotype distribution from Hardy-Weinberg equilibrium in the control ( $P < 1 \times 10^{-5}$ ). To increase the genotyping coverage between two datasets, we imputed missing genotypes and

SNPs using pre-phased reference haplotypes from the Haplotype Reference Consortium (HRC) panel version 1.1 for each dataset. We subjected all imputed SNPs to the same quality criteria described above and added the requirement of imputation quality with info score  $>0.5$ , leaving 35,685,761 and 39,044,005 SNPs for discovery and replication analysis, respectively.

### ***Statistical analysis***

We applied the  $\chi^2$  test or a logistic regression procedure using PLINK v1.09 [15] to test both genotyped and imputed SNPs for association. A Korean sample was used in discovery stage. Under the additive gene model, the logistic regression analyses were adjusted for age, sex and the first four principal components (PCs), suggested from the smartpca program with EIGENSTRAT [16; 17]. Logistic regression models stratified on APOE genotype, presence of  $\epsilon 4$  in particular, were constructed to explore effect modification. We called SNPs with  $p < 5 \times 10^{-5}$  were potential suggestive SNPs and further considered for replication. In replication stage, Japanese data were analyzed similarly done in the discovery stage, except five PCs were adjusted. The association of p value less than  $1 \times 10^{-3}$  was considered significant. The SNPs with reverse direction of the odds ratio were excluded. An inverse variance-weighted fixed effects meta-analysis was used to test for association with AD. We performed meta-analysis using METAL, and selected SNPs with p less than  $5 \times 10^{-5}$ .

## **RESULTS**

### ***GWAS of AD in East Asian***

There were 486 SNPs that reached the suggestive level, but 80 of them were reproduced in replication data, and 54 were significant variants as a result of meta-analysis, most of them were related with APOE which were located in chromosome 19, and only two were present in other chromosome. The SNPs within TOMM40, PVRL2, ABCA7 and BIN1, which had been reported as AD risk genes, were replicated in GWAS using East Asian. [18; 19; 20] The novel SNPs are located in the RP4-810F7.1-SPTLC1P2 in chromosome 6. In GWAS using the APOE e4 non-carrier group, 74 variants reached the suggestive level, of which only two variants have obtained significant levels in replication and meta-analysis. The two variants are located in LRIG1 and CACNA1A respectively. The GWAS using the APOE e4 carrier group had 219 variants having the suggestive level in discovery stage, but there were no variants passing through the replication, and no meta-analysis resulted in significant levels.

## DISCUSSION

We carried out an APOE e4 stratified GWAS using East Asian and identified novel SNPs among APOE e4 non-carriers GWA study associated with AD. Most of the significant variations found in the analysis using the all sample were found in previous studies [21], and the significance was replicated. We found that the novel SNPs located in LRIG1 gene and CACNA1A gene were genetically associated with AD in meta-analysis. In addition, we also found that those SNPs (or genes) are neurobiological related, although no link to dementia has been reported. For example, the genetic function of LRIG1 has been shown to be involved in the dendritic formation of neurons, as well as to affect the neural cell function of the hippocampus. [22] Also,

CACNA1A genes code subunits of neuronal calcium channel, which are found to be involved in the neuronal cell death and the toxicity of amyloid beta. [23; 24] Although we did not attempt to discover AD associated SNP through large-scale group comparison, we overcame by understanding the characteristics of AD and comparing well-refined small, genetically homogeneous groups.

## LEGEND TO FIGURES AND TABLES

**Figure 1.** Manhattan plot of a genome-wide association analysis of AD. X-axis shows chromosomal positions and Y-axis shows  $-\log_{10}$  p values. The upper and lower dotted lines indicate the genome-wide significance threshold ( $p=5.0 \times 10^{-8}$ ) and the cut-off level for selecting single-nucleotide polymorphisms for replication study ( $p=5.0 \times 10^{-5}$ ).

**Figure 2.** Regional association plots for top-ranked SNPs using all the samples. Each plot of SNPs has a Korean panel at the top and a Japanese panel at the bottom. The highest association signal in each panel is located on UGGT2 (A), RP4-810F7.1-SPTLC1P2 (B), BIN1-NIFKP9 (C) and RPL23AP22-RP11-563D10.1 (D). Region within 200 kb from SNPs showing lowest p value is displayed. SNPs showing the lowest p value in discovery study is depicted as a purple diamond. Other SNPs colored according to the extent of linkage disequilibrium (measured in  $r^2$ ) with SNP showing the lowest p value.

**Figure 3.** Regional association plots for top-ranked SNPs from APOE e4 non-carrier study. Each plot of SNPs has a Korean panel at the top and a Japanese panel at the bottom. The highest association signal in each panel is located on ADAM12-



LINC00601 (A), OPCML (B), LRIG (C) and CACNA1A (D). Region within 200 kb from SNPs showing lowest p value is displayed. SNPs showing the lowest p value is depicted as a purple diamond. Other SNPs colored according to the extent of linkage disequilibrium (measured in  $r^2$ ) with SNP showing the lowest p value.

**Table 1.** Summary of demographic information for each group in GWAS analyses

**Table 2.** Top-ranked genome-wide association results in the Korean discovery sample ( $P < 5 \times 10^{-5}$ ) and their replication in Japanese and meta-analyses.

## REFERENCES

- [1] L.A. Farrer, R.H. Myers, L. Connor, L.A. Cupples, and J.H. Growdon, Segregation analysis reveals evidence of a major gene for Alzheimer disease. *Am J Hum Genet* 48 (1991) 1026-33.
- [2] W.J. Strittmatter, K.H. Weisgraber, D.Y. Huang, L.M. Dong, G.S. Salvesen, M. Pericak-Vance, D. Schmechel, A.M. Saunders, D. Goldgaber, and A.D. Roses, Binding of human apolipoprotein E to synthetic amyloid beta peptide: isoform-specific effects and implications for late-onset Alzheimer disease. *Proc Natl Acad Sci U S A* 90 (1993) 8098-102.
- [3] P.P. Singh, M. Singh, and S.S. Mastana, APOE distribution in world populations with new data from India and the UK. *Ann Hum Biol* 33 (2006) 279-308.
- [4] R. Sherva, C.T. Baldwin, R. Inzelberg, B. Vardarajan, L.A. Cupples, K. Lunetta, A. Bowirrat, A. Naj, M. Pericak-Vance, R.P. Friedland, and L.A. Farrer, Identification of novel candidate genes for Alzheimer's disease by autozygosity mapping using genome wide SNP data. *J Alzheimers Dis* 23 (2011) 349-59.
- [5] Y. Ma, G.R. Jun, X. Zhang, J. Chung, A.C. Naj, Y. Chen, C. Bellenguez, K. Hamilton-Nelson, E.R. Martin, B.W. Kunkle, J.C. Bis, S. Debette, A.L. DeStefano, M. Fornage, G. Nicolas, C. van Duijn, D.A. Bennett, P.L. De Jager, R. Mayeux, J.L. Haines, M.A. Pericak-Vance, S. Seshadri, J.C. Lambert, G.D. Schellenberg, K.L. Lunetta, L.A. Farrer, P. Alzheimer's Disease Sequencing, and P. Alzheimer's Disease Exome Sequencing-France, Analysis of Whole-Exome Sequencing Data for Alzheimer Disease Stratified by APOE Genotype. *JAMA Neurol* (2019).
- [6] M. Ghani, C. Reitz, R. Cheng, B.N. Vardarajan, G. Jun, C. Sato, A. Naj, R. Rajbhandary, L.S. Wang, O. Valladares, C.F. Lin, E.B. Larson, N.R. Graff-Radford, D. Evans, P.L. De Jager, P.K. Crane, J.D. Buxbaum, J.R. Murrell, T. Raj, N. Ertekin-Taner, M. Logue, C.T. Baldwin, R.C. Green, L.L. Barnes, L.B. Cantwell, M.D. Fallin, R.C. Go, P.A. Griffith, T.O. Obisesan, J.J. Manly, K.L. Lunetta, M.I. Kamboh, O.L. Lopez, D.A. Bennett, H. Hendrie, K.S. Hall, A.M. Goate, G.S. Byrd, W.A. Kukull, T.M. Foroud, J.L. Haines, L.A. Farrer, M.A. Pericak-Vance, J.H. Lee, G.D. Schellenberg, P. St George-Hyslop, R. Mayeux, E. Rogaeva, and C. Alzheimer's Disease Genetics, Association of Long Runs of Homozygosity With Alzheimer Disease Among African American Individuals. *JAMA Neurol* 72 (2015) 1313-23.
- [7] G.R. Jun, J. Chung, J. Mez, R. Barber, G.W. Beecham, D.A. Bennett, J.D. Buxbaum, G.S. Byrd, M.M. Carrasquillo, P.K. Crane, C. Cruchaga, P. De Jager, N. Ertekin-Taner, D. Evans, M.D. Fallin, T.M. Foroud, R.P. Friedland, A.M. Goate, N.R. Graff-Radford, H. Hendrie, K.S. Hall, K.L. Hamilton-Nelson, R. Inzelberg, M.I. Kamboh, J.S.K. Kauwe, W.A. Kukull, B.W. Kunkle, R. Kuwano, E.B. Larson, M.W. Logue, J.J. Manly, E.R. Martin, T.J. Montine, S. Mukherjee, A. Naj, E.M. Reiman, C. Reitz, R. Sherva, P.H. St George-Hyslop, T. Thornton, S.G. Younkin, B.N. Vardarajan, L.S. Wang, J.R. Wendlund, A.R. Winslow, C. Alzheimer's Disease Genetics, J. Haines, R. Mayeux, M.A. Pericak-Vance, G. Schellenberg, K.L. Lunetta, and L.A. Farrer, Transethnic genome-wide

- scan identifies novel Alzheimer's disease loci. *Alzheimers Dement* 13 (2017) 727-738.
- [8] Y. Meng, C.T. Baldwin, A. Bowirrat, K. Waraska, R. Inzelberg, R.P. Friedland, and L.A. Farrer, Association of polymorphisms in the Angiotensin-converting enzyme gene with Alzheimer disease in an Israeli Arab community. *Am J Hum Genet* 78 (2006) 871-877.
- [9] A. Miyashita, A. Koike, G. Jun, L.S. Wang, S. Takahashi, E. Matsubara, T. Kawarabayashi, M. Shoji, N. Tomita, H. Arai, T. Asada, Y. Harigaya, M. Ikeda, M. Amari, H. Hanyu, S. Higuchi, T. Ikeuchi, M. Nishizawa, M. Suga, Y. Kawase, H. Akatsu, K. Kosaka, T. Yamamoto, M. Imagawa, T. Hamaguchi, M. Yamada, T. Morihara, M. Takeda, T. Takao, K. Nakata, Y. Fujisawa, K. Sasaki, K. Watanabe, K. Nakashima, K. Urakami, T. Ooya, M. Takahashi, T. Yuzuriha, K. Serikawa, S. Yoshimoto, R. Nakagawa, J.W. Kim, C.S. Ki, H.H. Won, D.L. Na, S.W. Seo, I. Mook-Jung, C. Alzheimer Disease Genetics, P. St George-Hyslop, R. Mayeux, J.L. Haines, M.A. Pericak-Vance, M. Yoshida, N. Nishida, K. Tokunaga, K. Yamamoto, S. Tsuji, I. Kanazawa, Y. Ihara, G.D. Schellenberg, L.A. Farrer, and R. Kuwano, SORL1 is genetically associated with late-onset Alzheimer's disease in Japanese, Koreans and Caucasians. *PLoS One* 8 (2013) e58618.
- [10] E. Rogaeva, Y. Meng, J.H. Lee, Y. Gu, T. Kawarai, F. Zou, T. Katayama, C.T. Baldwin, R. Cheng, H. Hasegawa, F. Chen, N. Shibata, K.L. Lunetta, R. Pardossi-Piquard, C. Bohm, Y. Wakutani, L.A. Cupples, K.T. Cuenca, R.C. Green, L. Pinassi, I. Rainero, S. Sorbi, A. Bruni, R. Duara, R.P. Friedland, R. Inzelberg, W. Hampe, H. Bujo, Y.Q. Song, O.M. Andersen, T.E. Willnow, N. Graff-Radford, R.C. Petersen, D. Dickson, S.D. Der, P.E. Fraser, G. Schmitt-Ulms, S. Younkin, R. Mayeux, L.A. Farrer, and P. St George-Hyslop, The neuronal sortilin-related receptor SORL1 is genetically associated with Alzheimer disease. *Nat Genet* 39 (2007) 168-77.
- [11] S. Moon, Y.J. Kim, S. Han, M.Y. Hwang, D.M. Shin, M.Y. Park, Y. Lu, K. Yoon, H.M. Jang, Y.K. Kim, T.J. Park, D.S. Song, J.K. Park, J.E. Lee, and B.J. Kim, The Korea Biobank Array: Design and Identification of Coding Variants Associated with Blood Biochemical Traits. *Sci Rep* 9 (2019) 1382.
- [12] S. McCarthy, S. Das, W. Kretschmar, O. Delaneau, A.R. Wood, A. Teumer, H.M. Kang, C. Fuchsberger, P. Danecek, K. Sharp, Y. Luo, C. Sidore, A. Kwong, N. Timpson, S. Koskinen, S. Vrieze, L.J. Scott, H. Zhang, A. Mahajan, J. Veldink, U. Peters, C. Pato, C.M. van Duijn, C.E. Gillies, I. Gandin, M. Mezzavilla, A. Gilly, M. Cocca, M. Traglia, A. Angius, J.C. Barrett, D. Boomsma, K. Branham, G. Breen, C.M. Brummett, F. Busonero, H. Campbell, A. Chan, S. Chen, E. Chew, F.S. Collins, L.J. Corbin, G.D. Smith, G. Dedoussis, M. Dorr, A.E. Farmaki, L. Ferrucci, L. Forer, R.M. Fraser, S. Gabriel, S. Levy, L. Groop, T. Harrison, A. Hattersley, O.L. Holmen, K. Hveem, M. Kretzler, J.C. Lee, M. McGue, T. Meitinger, D. Melzer, J.L. Min, K.L. Mohlke, J.B. Vincent, M. Nauck, D. Nickerson, A. Palotie, M. Pato, N. Pirastu, M. McInnis, J.B. Richards, C. Sala, V. Salomaa, D. Schlessinger, S. Schoenherr, P.E. Slagboom, K. Small, T. Spector, D. Stambolian, M. Tuke, J. Tuomilehto, L.H. Van den Berg, W. Van Rheenen, U. Volker, C. Wijmenga, D. Toniolo, E. Zeggini, P. Gasparini, M.G. Sampson, J.F. Wilson, T. Frayling, P.I. de

- Bakker, M.A. Swertz, S. McCarroll, C. Kooperberg, A. Dekker, D. Altshuler, C. Willer, W. Iacono, S. Ripatti, et al., A reference panel of 64,976 haplotypes for genotype imputation. *Nat Genet* 48 (2016) 1279-83.
- [13] G. McKhann, D. Drachman, M. Folstein, R. Katzman, D. Price, and E.M. Stadlan, Clinical diagnosis of Alzheimer's disease: Report of the NINCDS--ADRDA Work Group under the auspices of Department of Health and Human Services Task Force on Alzheimer's Disease. *Neurology* 77 (2011) 333-333.
- [14] C.A. Anderson, F.H. Pettersson, G.M. Clarke, L.R. Cardon, A.P. Morris, and K.T. Zondervan, Data quality control in genetic case-control association studies. *Nat Protoc* 5 (2010) 1564-73.
- [15] S. Purcell, B. Neale, K. Todd-Brown, L. Thomas, M.A. Ferreira, D. Bender, J. Maller, P. Sklar, P.I. de Bakker, M.J. Daly, and P.C. Sham, PLINK: a tool set for whole-genome association and population-based linkage analyses. *Am J Hum Genet* 81 (2007) 559-75.
- [16] A.L. Price, N.J. Patterson, R.M. Plenge, M.E. Weinblatt, N.A. Shadick, and D. Reich, Principal components analysis corrects for stratification in genome-wide association studies. *Nat Genet* 38 (2006) 904-9.
- [17] N. Patterson, A.L. Price, and D. Reich, Population structure and eigenanalysis. *PLoS Genet* 2 (2006) e190.
- [18] S. Seshadri, A.L. Fitzpatrick, M.A. Ikram, A.L. DeStefano, V. Gudnason, M. Boada, J.C. Bis, A.V. Smith, M.M. Carrasquillo, J.C. Lambert, D. Harold, E.M.C. Schrijvers, R. Ramirez-Lorca, S. DeBette, W.T. Longstreth, A.C.J.W. Janssens, V.S. Pankratz, J.F. Dartigues, P. Hollingworth, T. Aspelund, I. Hernandez, A. Beiser, L.H. Kuller, P.J. Koudstaal, D.W. Dickson, C. Tzourio, R. Abraham, C. Antunez, Y. Du, J.I. Rotter, Y.S. Aulchenko, T.B. Harris, R.C. Petersen, C. Berr, M.J. Owen, J. Lopez-Arrieta, B.N. Vardarajan, J.T. Becker, F. Rivadeneira, M.A. Nalls, N.R. Graff-Radford, D. Campion, S. Auerbach, K. Rice, A. Hofman, P.V. Jonsson, H. Schmidt, M. Lathrop, T.H. Mosley, R. Au, B.M. Psaty, A.G. Uitterlinden, L.A. Farrer, T. Lumley, A. Ruiz, J. Williams, P. Amouyel, S.G. Younkin, P.A. Wolf, L.J. Launer, O.L. Lopez, C.M. van Duijn, M.M.B. Breteler, G. CHARGE, and f.t. EADI1 Consortia, Genome-wide Analysis of Genetic Loci Associated With Alzheimer Disease. *JAMA* 303 (2010) 1832-1840.
- [19] J.C. Lambert, C.A. Ibrahim-Verbaas, D. Harold, A.C. Naj, R. Sims, C. Bellenguez, A.L. DeStafano, J.C. Bis, G.W. Beecham, B. Grenier-Boley, G. Russo, T.A. Thorton-Wells, N. Jones, A.V. Smith, V. Chouraki, C. Thomas, M.A. Ikram, D. Zelenika, B.N. Vardarajan, Y. Kamatani, C.F. Lin, A. Gerrish, H. Schmidt, B. Kunkle, M.L. Dunstan, A. Ruiz, M.T. Bihoreau, S.H. Choi, C. Reitz, F. Pasquier, C. Cruchaga, D. Craig, N. Amin, C. Berr, O.L. Lopez, P.L. De Jager, V. Deramecourt, J.A. Johnston, D. Evans, S. Lovestone, L. Letenneur, F.J. Moron, D.C. Rubinsztein, G. Eiriksdottir, K. Sleegers, A.M. Goate, N. Fievet, M.W. Huentelman, M. Gill, K. Brown, M.I. Kamboh, L. Keller, P. Barberger-Gateau, B. McGuiness, E.B. Larson, R. Green, A.J. Myers, C. Dufouil, S. Todd, D. Wallon, S. Love, E. Rogaeva, J. Gallacher, P. St George-Hyslop, J. Clarimon, A. Lleó, A. Bayer,

- D.W. Tsuang, L. Yu, M. Tsolaki, P. Bossu, G. Spalletta, P. Proitsi, J. Collinge, S. Sorbi, F. Sanchez-Garcia, N.C. Fox, J. Hardy, M.C. Deniz Naranjo, P. Bosco, R. Clarke, C. Brayne, D. Galimberti, M. Mancuso, F. Matthews, I. European Alzheimer's Disease, Genetic, D. Environmental Risk in Alzheimer's, C. Alzheimer's Disease Genetic, H. Cohorts for, E. Aging Research in Genomic, S. Moebus, P. Mecocci, M. Del Zompo, W. Maier, H. Hampel, A. Pilotto, M. Bullido, F. Panza, P. Caffarra, et al., Meta-analysis of 74,046 individuals identifies 11 new susceptibility loci for Alzheimer's disease. *Nat Genet* 45 (2013) 1452-8.
- [20] J.F.F. Almeida, L.R. Dos Santos, M. Trancozo, and F. de Paula, Updated Meta-Analysis of BIN1, CR1, MS4A6A, CLU, and ABCA7 Variants in Alzheimer's Disease. *J Mol Neurosci* 64 (2018) 471-477.
- [21] B.W. Kunkle, B. Grenier-Boley, R. Sims, J.C. Bis, V. Damotte, A.C. Naj, A. Boland, M. Vronskaya, S.J. van der Lee, A. Amlie-Wolf, C. Bellenguez, A. Frizatti, V. Chouraki, E.R. Martin, K. Sleegers, N. Badarinarayan, J. Jakobsdottir, K.L. Hamilton-Nelson, S. Moreno-Grau, R. Olaso, R. Raybould, Y. Chen, A.B. Kuzma, M. Hiltunen, T. Morgan, S. Ahmad, B.N. Vardarajan, J. Epelbaum, P. Hoffmann, M. Boada, G.W. Beecham, J.G. Garnier, D. Harold, A.L. Fitzpatrick, O. Valladares, M.L. Moutet, A. Gerrish, A.V. Smith, L. Qu, D. Bacq, N. Denning, X. Jian, Y. Zhao, M. Del Zompo, N.C. Fox, S.H. Choi, I. Mateo, J.T. Hughes, H.H. Adams, J. Malamon, F. Sanchez-Garcia, Y. Patel, J.A. Brody, B.A. Dombroski, M.C.D. Naranjo, M. Daniilidou, G. Eiriksdottir, S. Mukherjee, D. Wallon, J. Uphill, T. Aspelund, L.B. Cantwell, F. Garzia, D. Galimberti, E. Hofer, M. Butkiewicz, B. Fin, E. Scarpini, C. Sarnowski, W.S. Bush, S. Meslage, J. Kornhuber, C.C. White, Y. Song, R.C. Barber, S. Engelborghs, S. Sordon, D. Vojnovic, P.M. Adams, R. Vandenberghe, M. Mayhaus, L.A. Cupples, M.S. Albert, P.P. De Deyn, W. Gu, J.J. Himali, D. Beekly, A. Squassina, A.M. Hartmann, A. Orellana, D. Blacker, E. Rodriguez-Rodriguez, S. Lovestone, M.E. Garcia, R.S. Doody, C. Munoz-Fernandez, R. Sussams, H. Lin, T.J. Fairchild, Y.A. Benito, et al., Genetic meta-analysis of diagnosed Alzheimer's disease identifies new risk loci and implicates Abeta, tau, immunity and lipid processing. *Nat Genet* 51 (2019) 414-430.
- [22] F.C. Alsina, F.J. Hita, P.A. Fontanet, D. Irala, H. Hedman, F. Ledda, and G. Paratcha, Lrig1 is a cell-intrinsic modulator of hippocampal dendrite complexity and BDNF signaling. *EMBO Rep* 17 (2016) 601-16.
- [23] C. Supnet, and I. Bezprozvanny, The dysregulation of intracellular calcium in Alzheimer disease. *Cell Calcium* 47 (2010) 183-9.
- [24] A. Demuro, I. Parker, and G.E. Stutzmann, Calcium signaling and amyloid toxicity in Alzheimer disease. *J Biol Chem* 285 (2010) 12463-8.

## FIGURES & TABLES

Table 1. Summary of demographic information for each group in GWAS analyses

|                        | Discovery   |             | Replication |             |
|------------------------|-------------|-------------|-------------|-------------|
|                        | CN          | AD          | CN          | AD          |
| All samples, n         | 1,172       | 1,119       | 976         | 980         |
| Female, n (%)          | 661 (56.4)  | 715 (63.9)  | 564 (57.8)  | 702 (71.6)  |
| Age, m (s.d)           | 76.03 (8.9) | 74.60 (8.9) | 76.94 (5.9) | 72.99 (4.3) |
| APOE e4 non-carrier, n | 976         | 621         | 815         | 435         |
| Female, n (%)          | 544 (55.7)  | 393 (63.3)  | 470 (57.7)  | 31 (71.3)   |
| Age, m (s.d)           | 76.10 (8.9) | 75.43 (9.1) | 77.11 (5.9) | 73.42 (4.3) |
| APOE e4 carrier        | 196         | 498         | 161         | 545         |
| Female, n (%)          | 117 (59.7)  | 322 (64.7)  | 94 (58.4)   | 392 (68.3)  |
| Age, m (s.d)           | 95.45 (8.9) | 73.32 (9.0) | 76.06 (5.9) | 72.65 (4.3) |

Table x. Top-ranked genome-wide association results in the Korean discovery sample ( $P < 5 \times 10^{-5}$ )

| CHR         | SNP (type)*    | BP        | Allele | Count | Genotype frequency |                      | GENE                     | Association            | Additive model         | EUR<br>MAF | Previously reported genes or SNPs |                         |     |
|-------------|----------------|-----------|--------|-------|--------------------|----------------------|--------------------------|------------------------|------------------------|------------|-----------------------------------|-------------------------|-----|
|             |                |           |        |       | Case<br>(n=1,119)  | Control<br>(n=1,172) |                          | P<br>OR (95%CI)        | P<br>OR (95%CI)        |            | REPORTED<br>GENE(SNP)             | P                       | Ref |
| ALL samples |                |           |        |       |                    |                      |                          |                        |                        |            |                                   |                         |     |
| 19          | rs429358 (m)   | 45411941  | CC     | 78    | 0.257              | 0.084                | APOE                     | 5.84×10 <sup>-55</sup> | 3.74×10 <sup>-43</sup> | 0.155      | rs429358                          | 1.04×10 <sup>-295</sup> |     |
|             |                |           | CT     | 420   |                    |                      |                          | 3.756 (3.16-4.47)      | 3.637 (3.03-4.37)      |            |                                   |                         |     |
|             |                |           | TT     | 621   |                    |                      |                          |                        |                        |            |                                   |                         |     |
| 19          | rs101119 (3')  | 45406673  | AA     | 84    | 0.269              | 0.096                | TOMM40                   | 1.31×10 <sup>-52</sup> | 9.58×10 <sup>-42</sup> | 0.287      | rs101119                          | 8.15×10 <sup>-70</sup>  |     |
|             |                |           | AG     | 434   |                    |                      |                          | 3.483 (2.95-4.11)      | 3.378 (2.83-4.03)      |            |                                   |                         |     |
|             |                |           | GG     | 601   |                    |                      |                          |                        |                        |            |                                   |                         |     |
| 19          | rs10414043 (g) | 45415713  | AA     | 55    | 0.212              | 0.078                | APOC1                    | 3.92×10 <sup>-38</sup> | 3.92×10 <sup>-31</sup> | 0.124      | APOC1<br>(rs4420638)              | 1.07×10 <sup>-144</sup> |     |
|             |                |           | AG     | 364   |                    |                      |                          | 3.173 (2.65-3.81)      | 3.082 (2.55-3.73)      |            |                                   |                         |     |
|             |                |           | GG     | 700   |                    |                      |                          |                        |                        |            |                                   |                         |     |
| 19          | rs412776 (i)   | 45379516  | AA     | 77    | 0.252              | 0.108                | PVRL2                    | 1×10 <sup>-36</sup>    | 1.04×10 <sup>-28</sup> | 0.112      | PVRL2<br>(rs6857)                 | 1.49×10 <sup>-108</sup> |     |
|             |                |           | AG     | 409   |                    |                      |                          | 2.766 (2.35-3.25)      | 2.576 (2.18-3.04)      |            |                                   |                         |     |
|             |                |           | GG     | 633   |                    |                      |                          |                        |                        |            |                                   |                         |     |
| 19          | rs41290098 (i) | 45370278  | TT     | 199   | 0.441              | 0.511                | NECTIN2                  | 2.38×10 <sup>-6</sup>  | 9.33×10 <sup>-6</sup>  | 0.150      |                                   |                         |     |
|             |                |           | TA     | 589   |                    |                      |                          | 0.756 (0.67-0.85)      | 0.765 (0.68-0.86)      |            |                                   |                         |     |
|             |                |           | AA     | 331   |                    |                      |                          |                        |                        |            |                                   |                         |     |
| 19          | rs3752243 (s)  | 1054060   | GG     | 124   | 0.354              | 0.413                | ABCA7                    | 3.48×10 <sup>-5</sup>  | 6.27×10 <sup>-5</sup>  | 0.424      | ABCA7<br>(rs3764650)              | 5.00×10 <sup>-21</sup>  |     |
|             |                |           | GA     | 544   |                    |                      |                          | 0.777 (0.69-0.88)      | 0.776 (0.69-0.88)      |            |                                   |                         |     |
|             |                |           | AA     | 451   |                    |                      |                          |                        |                        |            |                                   |                         |     |
| 6           | rs6933447 (g)  | 23656312  | CC     | 12    | 0.126              | 0.171                | RP4-810F7.1-<br>SPTLC1P2 | 1.51×10 <sup>-5</sup>  | 7.17×10 <sup>-6</sup>  | 0.534      |                                   |                         |     |
|             |                |           | CT     | 257   |                    |                      |                          | 0.696 (0.59-0.82)      | 0.678 (0.57-0.8)       |            |                                   |                         |     |
|             |                |           | TT     | 850   |                    |                      |                          |                        |                        |            |                                   |                         |     |
| 2           | rs35103166 (g) | 127882182 | CC     | 289   | 0.507              | 0.445                | BIN1-NIFKP9              | 3.27×10 <sup>-5</sup>  | 1.07×10 <sup>-5</sup>  | 0.391      | rs35103166                        | 2.10×10 <sup>-8</sup>   |     |
|             |                |           | CT     | 556   |                    |                      |                          | 1.279 (1.14-1.44)      | 1.300 (1.16-1.46)      |            |                                   |                         |     |
|             |                |           | TT     | 274   |                    |                      |                          |                        |                        |            |                                   |                         |     |
| 19          | rs62117161 (g) | 45233385  | GG     | 32    | 0.186              | 0.141                | snoZ6                    | 4.28×10 <sup>-5</sup>  | 1.50×10 <sup>-4</sup>  | 0.066      |                                   |                         |     |

|                            |                 |          |    |     |       |       |         |                       |                       |                   |   |
|----------------------------|-----------------|----------|----|-----|-------|-------|---------|-----------------------|-----------------------|-------------------|---|
|                            |                 |          | GA | 352 |       |       |         |                       | 1.389 (1.19-1.63)     | 1.368 (1.16-1.61) |   |
|                            |                 |          | AA | 735 |       |       |         |                       |                       |                   |   |
| <b>APOE e4 non-carrier</b> |                 |          |    |     |       |       |         |                       |                       |                   |   |
| 19                         | rs189753894 (g) | 13624489 | AA | 8   | 0.109 | 0.066 | CACNA1A | $1.55 \times 10^{-5}$ | $2.68 \times 10^{-5}$ | -                 |   |
|                            |                 |          | AC | 119 |       |       |         | 1.738 (1.35-2.24)     | 1.726 (1.34-2.23)     |                   |   |
|                            |                 |          | CC | 494 |       |       |         |                       |                       |                   |   |
| 3                          | rs113765515 (i) | 66539846 | GG | 1   | 0.064 | 0.105 | LRIG1   | $2.02 \times 10^{-5}$ | $1.78 \times 10^{-5}$ | 0.301             |   |
|                            |                 |          | GT | 74  |       |       |         | 0.556 (0.42-0.73)     | 0.541 (0.41-0.72)     |                   |   |
|                            |                 |          | TT | 546 |       |       |         |                       |                       |                   |   |
| <b>APOE e4 carrier</b>     |                 |          |    |     |       |       |         |                       |                       |                   |   |
| -                          | -               | -        | -  | -   | -     | -     | -       | -                     | -                     | -                 | - |

\*m: missense, s: synonymous, i: intronic, g: intergenic, 3': 3' UTR



Table 2. Top-ranked genome-wide association results in the Korean discovery sample ( $P < 5 \times 10^{-5}$ ) and their replication in Japanese and meta-analyses.

| CHR              | SNP (type)*    | BP        | m | M | MAF   | NEAREST GENE         | Korean (Discovery) |                        | Japanese (Replication) |                        | Meta-analysis |                             | Gene analysis |                        |
|------------------|----------------|-----------|---|---|-------|----------------------|--------------------|------------------------|------------------------|------------------------|---------------|-----------------------------|---------------|------------------------|
|                  |                |           |   |   |       |                      | OR (95%CI)         | P                      | OR (95%CI)             | P                      | OR            | P                           | # of SNPs     | P                      |
| ALL samples      |                |           |   |   |       |                      |                    |                        |                        |                        |               |                             |               |                        |
| 19               | rs429358 (m)   | 45411941  | C | T | 0.169 | APOE                 | 3.637 (3.03-4.37)  | 3.74×10 <sup>-43</sup> | 2.608 (2.04-3.33)      | 1.89×10 <sup>-14</sup> | 3.227         | 5.90×10 <sup>-55</sup>      | 11            | 2.44×10 <sup>-42</sup> |
| 19               | rs10119 (3')   | 45406673  | A | G | 0.180 | TOMM40               | 3.378 (2.83-4.03)  | 9.58×10 <sup>-42</sup> | 2.230 (1.88-2.65)      | 7.49×10 <sup>-20</sup> | 2.731         | 1.59×10 <sup>-57</sup>      | 79            | 6.19×10 <sup>-36</sup> |
| 19               | rs12972156 (i) | 45387459  | G | C | 0.151 | PVRL2                | 2.942 (2.45-3.54)  | 1.52×10 <sup>-30</sup> | 2.656 (2.06-3.43)      | 5.42×10 <sup>-14</sup> | 2.841         | 8.30×10 <sup>-43</sup>      | 233           | 9.36×10 <sup>-37</sup> |
| 13               | rs12863903 (m) | 96638651  | T | C | 0.028 | UGGT2                | 0.395 (0.27-0.58)  | 2.99×10 <sup>-6</sup>  | 0.797 (0.54-1.19)      | 2.62×10 <sup>-1</sup>  | 0.557         | 3.78×10 <sup>-5</sup>       | 653           | 4.16×10 <sup>-3</sup>  |
| 6                | rs6933447 (g)  | 23656312  | C | T | 0.149 | RP4-810F7.1-SPTLC1P2 | 0.678 (0.57-0.80)  | 7.17×10 <sup>-6</sup>  | 0.794 (0.67-0.94)      | 8.84×10 <sup>-3</sup>  | 0.733         | <b>4.70×10<sup>-7</sup></b> | -             | -                      |
| 2                | rs35103166 (g) | 127882182 | C | T | 0.475 | BIN1-NIFKP9          | 1.300 (1.16-1.46)  | 1.07×10 <sup>-5</sup>  | 1.236 (1.07-1.43)      | 3.95×10 <sup>-3</sup>  | 1.274         | 1.60×10 <sup>-7</sup>       | 349           | 3.70×10 <sup>-2</sup>  |
| 19               | rs41290098 (i) | 45370278  | T | A | 0.477 | NECTIN2              | 0.765 (0.68-0.86)  | 9.33×10 <sup>-6</sup>  | 0.661 (0.58-0.76)      | 3.33×10 <sup>-9</sup>  | 0.718         | 5.16×10 <sup>-13</sup>      | -             | -                      |
| APOE non-carrier |                |           |   |   |       |                      |                    |                        |                        |                        |               |                             |               |                        |
| 10               | rs4370848 (g)  | 128085524 | A | C | 0.246 | ADAM12-LINC00601     | 1.513 (1.29-1.78)  | 6.83×10 <sup>-7</sup>  | 1.051 (0.86-1.29)      | 6.30×10 <sup>-1</sup>  | 1.312         | 3.03×10 <sup>-5</sup>       | 2279          | 1.49×10 <sup>-2</sup>  |
| 11               | rs79251510 (i) | 132474969 | T | G | 0.141 | OPCML                | 0.594 (0.48-0.74)  | 3.39×10 <sup>-6</sup>  | 0.799 (0.61-1.04)      | 1.00×10 <sup>-1</sup>  | 0.669         | 3.63×10 <sup>-6</sup>       | 5189          | 3.13×10 <sup>-3</sup>  |

|    |                 |          |   |   |       |         |                      |                       |                      |                                         |       |                                         |      |                       |
|----|-----------------|----------|---|---|-------|---------|----------------------|-----------------------|----------------------|-----------------------------------------|-------|-----------------------------------------|------|-----------------------|
| 3  | rs2280575 (i)   | 66542863 | G | A | 0.092 | LRIG1   | 0.539<br>(0.41-0.71) | $1.15 \times 10^{-5}$ | 0.551<br>(0.40-0.76) | <b><math>3.46 \times 10^{-4}</math></b> | 0.544 | <b><math>1.51 \times 10^{-8}</math></b> | 553  | $4.56 \times 10^{-3}$ |
| 19 | rs189753894 (i) | 13624489 | A | C | 0.082 | CACNA1A | 1.726<br>(1.34-2.23) | $2.68 \times 10^{-5}$ | 1.9<br>(1.35-2.67)   | <b><math>2.22 \times 10^{-4}</math></b> | 1.787 | <b><math>2.49 \times 10^{-8}</math></b> | 1463 | $8.43 \times 10^{-1}$ |

**APOE e4 carrier**

|   |   |   |   |   |   |   |   |   |   |   |   |   |   |   |
|---|---|---|---|---|---|---|---|---|---|---|---|---|---|---|
| - | - | - | - | - | - | - | - | - | - | - | - | - | - | - |
|---|---|---|---|---|---|---|---|---|---|---|---|---|---|---|

---

\*m: missense, s: synonymous, i: intronic, g: intergenic, 3': 3' UTR

**Figure 1.**

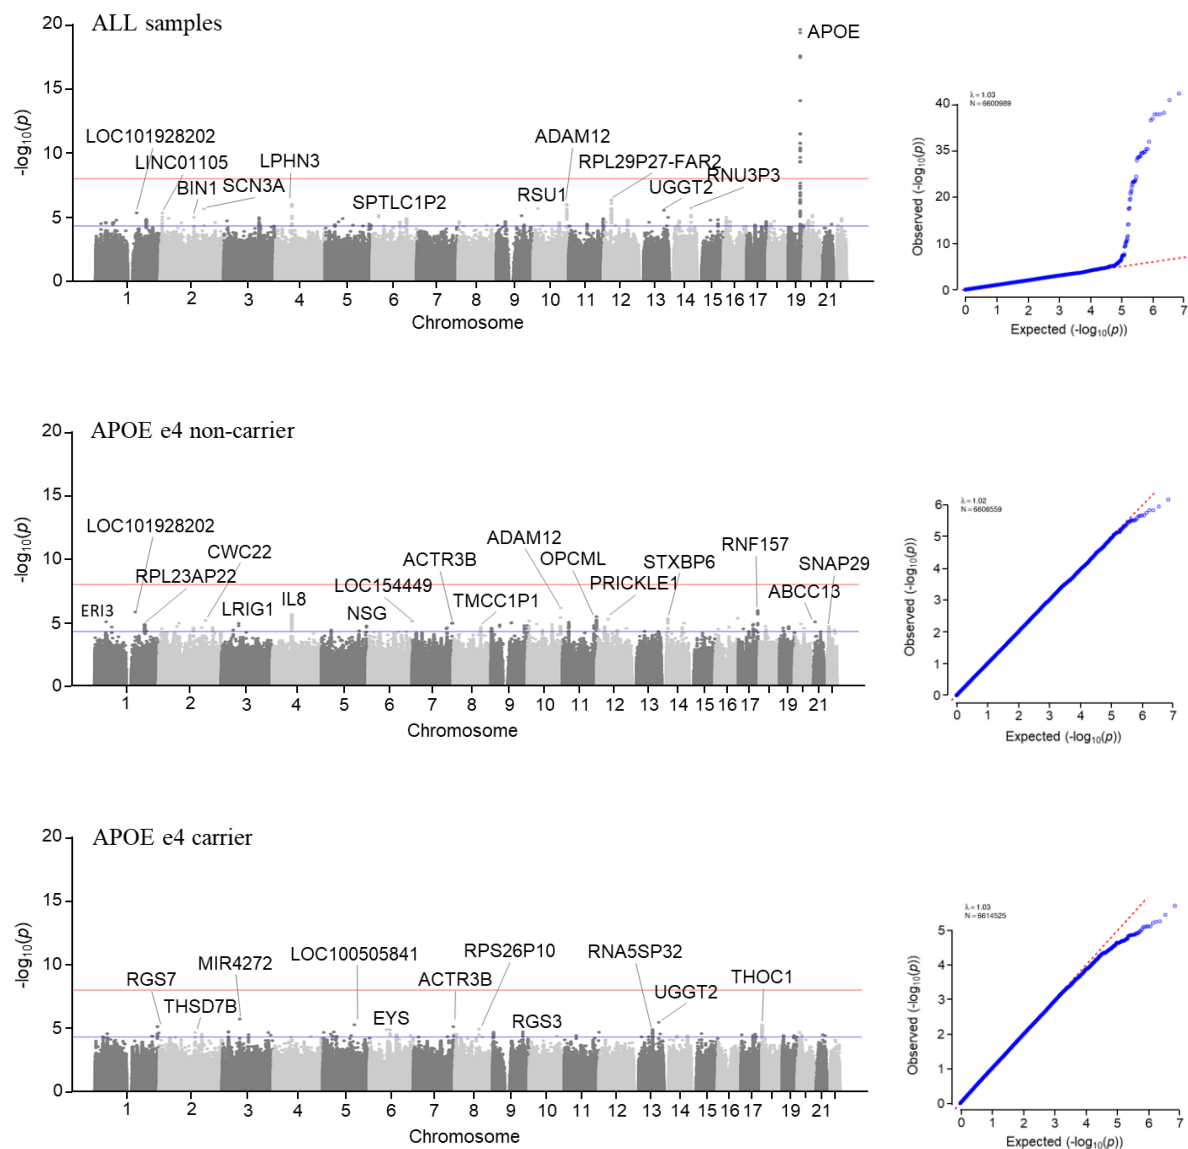

**Figure 2.**

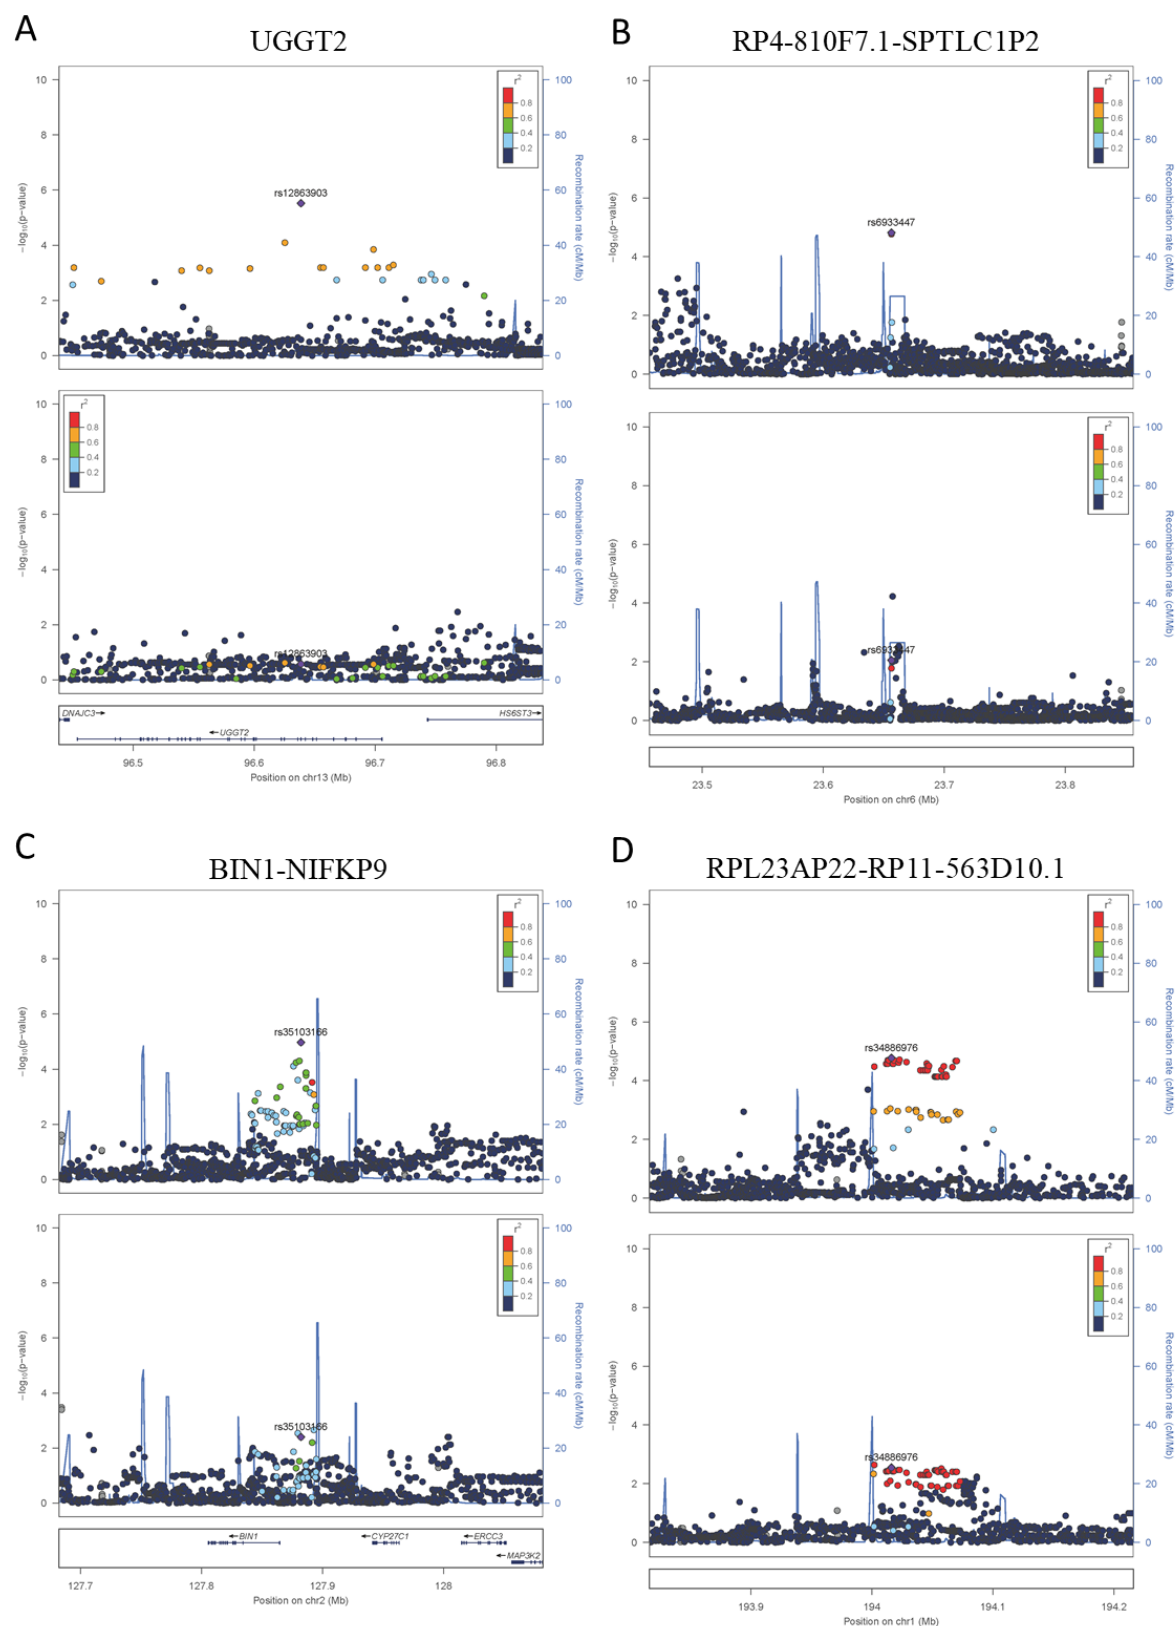

**Figure 3.**

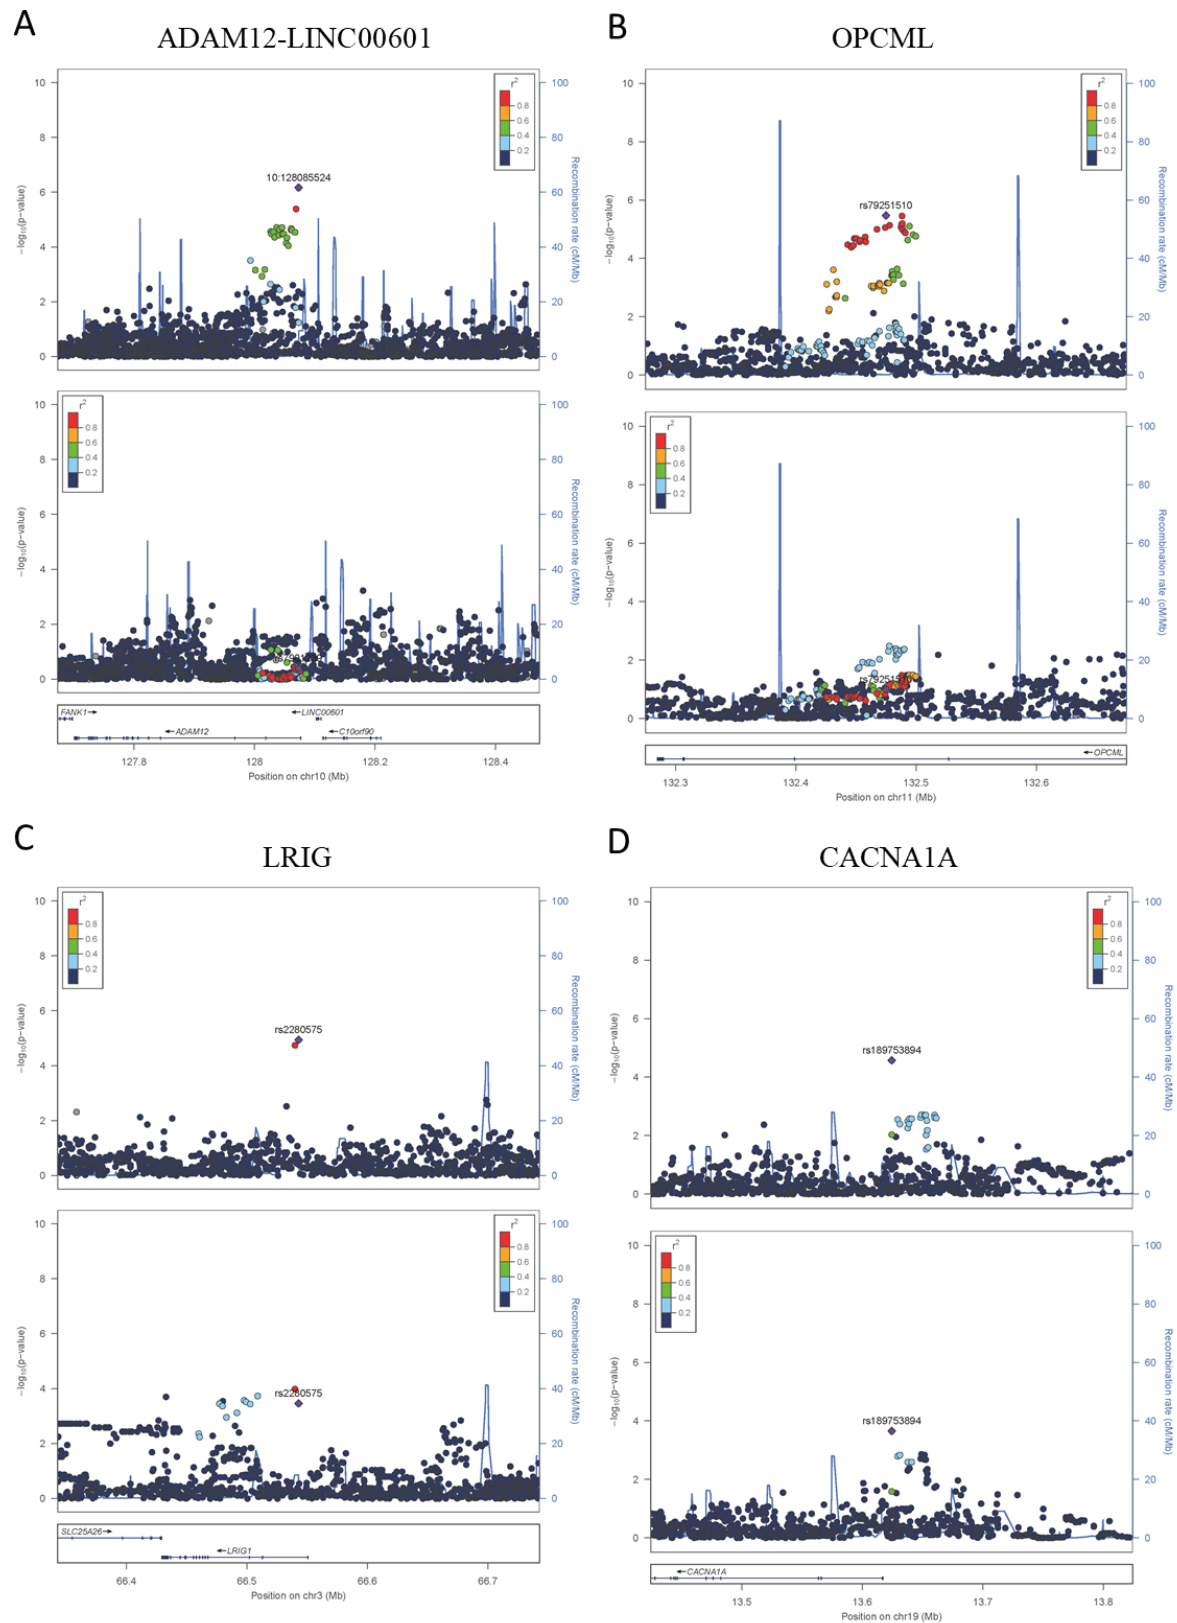

Source: http://medrxiv.stage.highwire.org/content/10.1101/2020.07.02.20145557v1.full.pdf
